# Supplementary material for: Asymmetry of Plant Cell Divisions under Salt Stress
Source: MDPI journal article supplement (doi:10.3390/sym13101811), 2021-09-28
Supplement: s1 [file s1]

Supplementary Materials

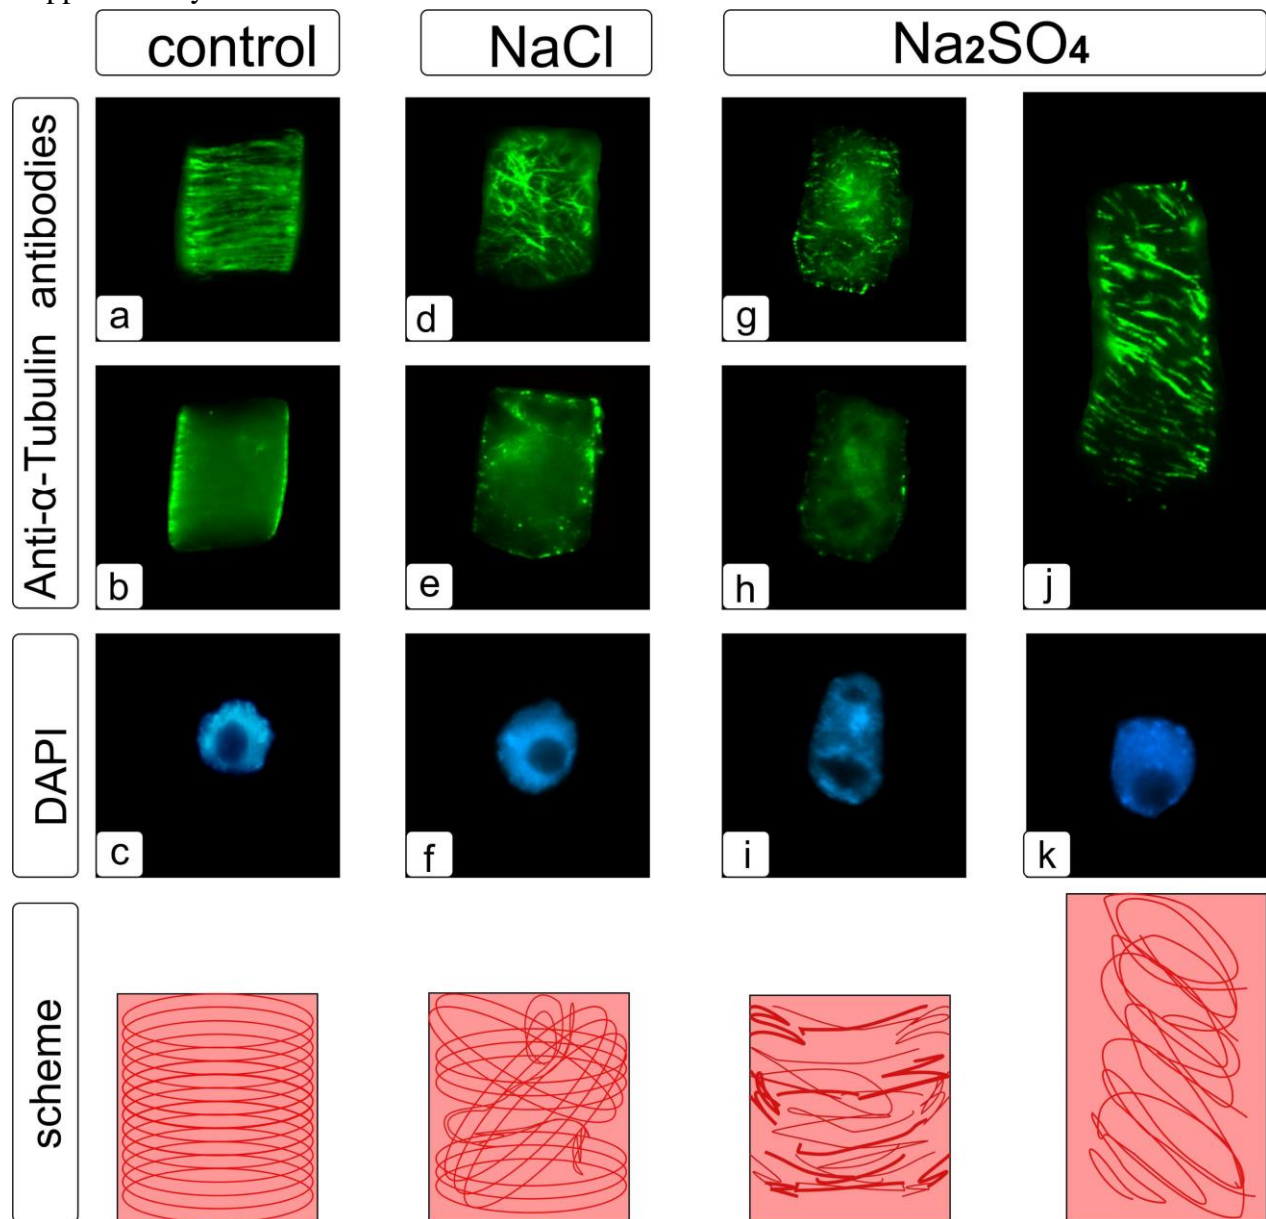

Supplement. Figure S1. Features of the structure of the interphase cytoskeleton and distribution of  $\alpha$ -tubulin in wheat seedlings during germination in water and in the presence of NaCl and Na<sub>2</sub>SO<sub>4</sub>. The phase of the cell cycle was determined by the identification of DNA staining using the DAPI assay (c,f,i,k). For most cells, an optical section is taken at the level of the cortical cytoplasm (a,d,g,j) and in the nucleus level – central part (b,e,h).

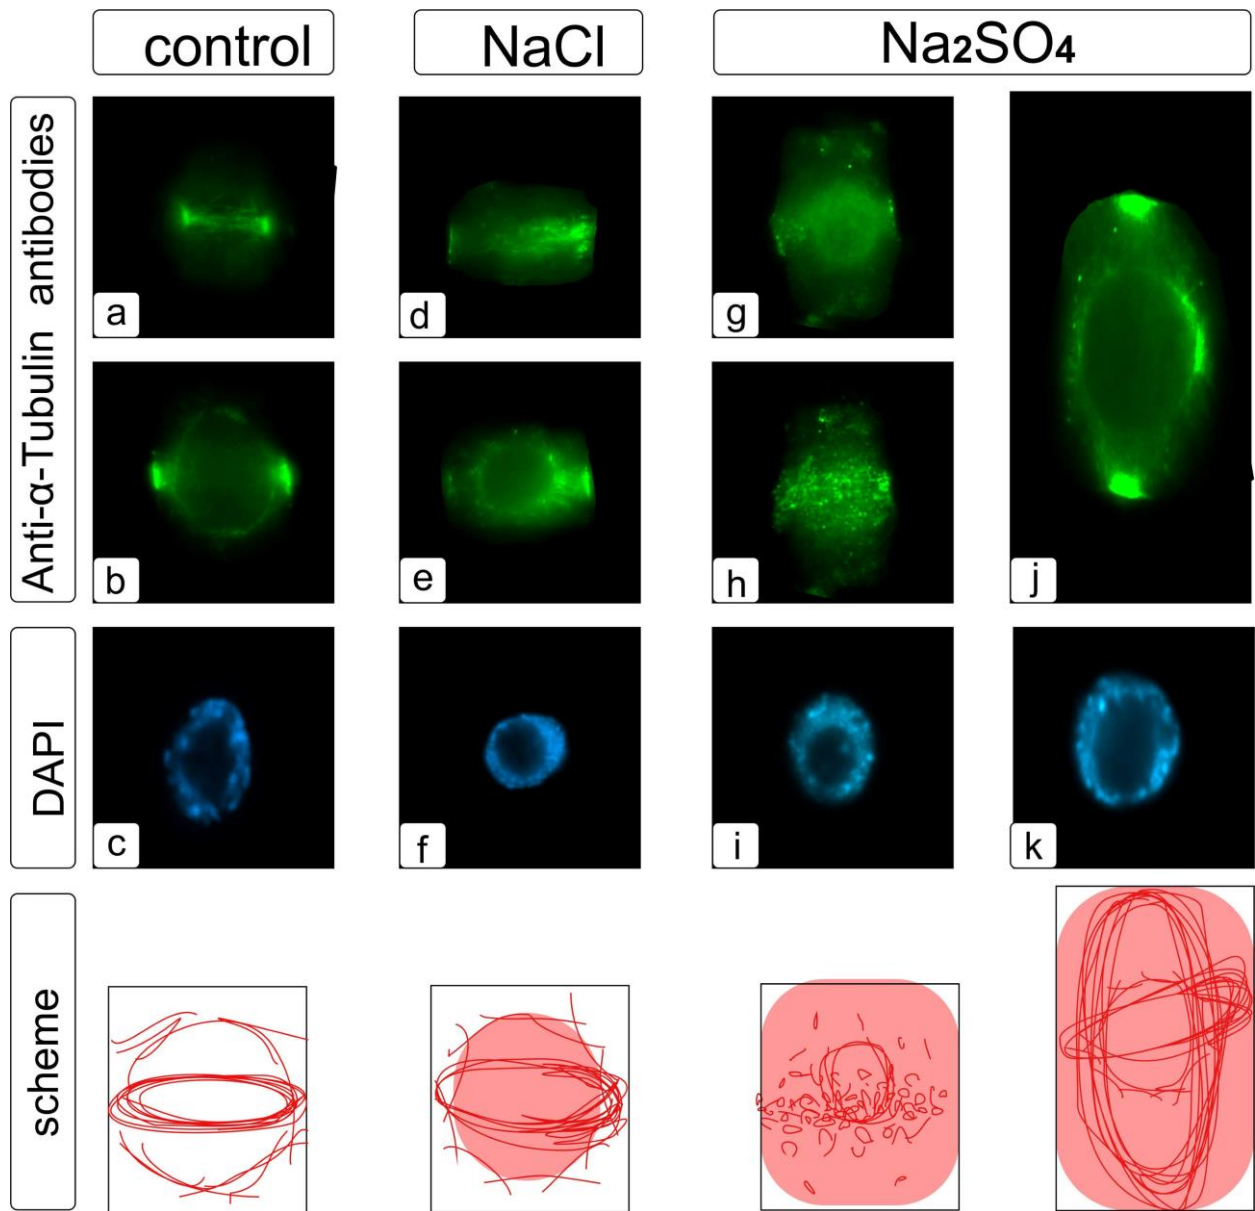

Supplement. Figure S2. Features of the structure of the preprophase cytoskeleton and distribution of  $\alpha$ -tubulin in wheat seedlings during germination in water and in the presence of NaCl and Na<sub>2</sub>SO<sub>4</sub>. The phase of the cell cycle was determined by the identification of DNA staining using the DAPI assay (c,f,i,k). For most cells, an optical section is taken at the level of the cortical cytoplasm – cell periphery (a,d,g) and in the nucleus level - central part (b,e,h,j).

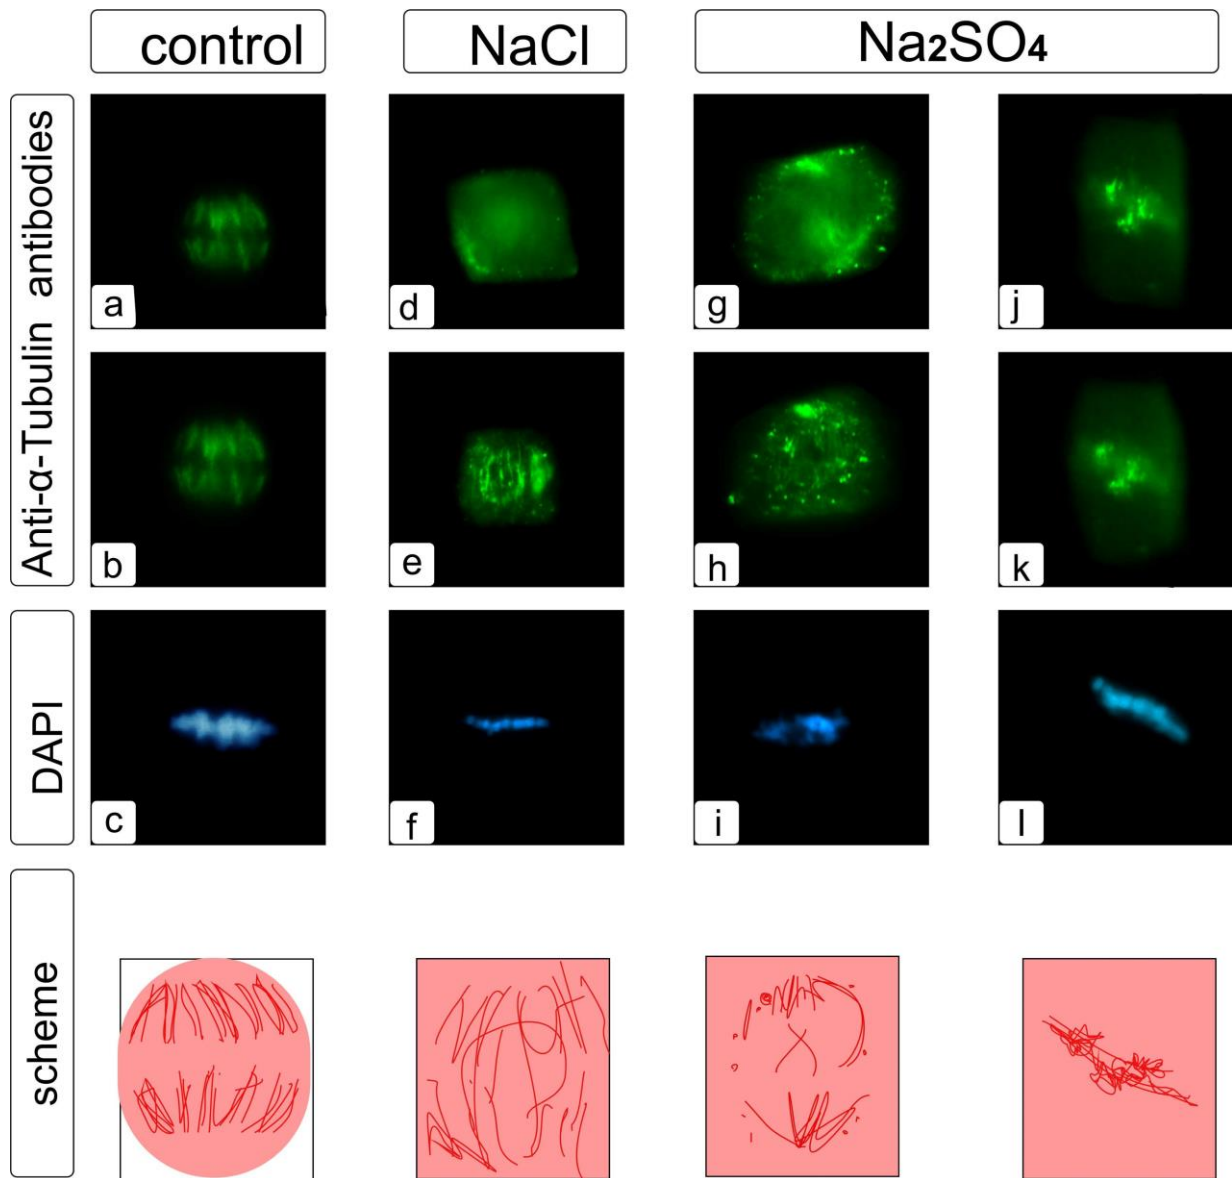

Supplement. Figure S3. Features of the prometaphase cytoskeleton structure and distribution of  $\alpha$ -tubulin in wheat seedlings during germination in water and in the presence of NaCl and Na<sub>2</sub>SO<sub>4</sub>. The phase of the cell cycle was determined by the identification of DNA staining using the DAPI assay (c,f,i,l). For most cells, an optical section is taken in the level of the cortical cytoplasm - cell periphery (a,d,g,j) and in the nucleus level - central part (b,e,h,k).

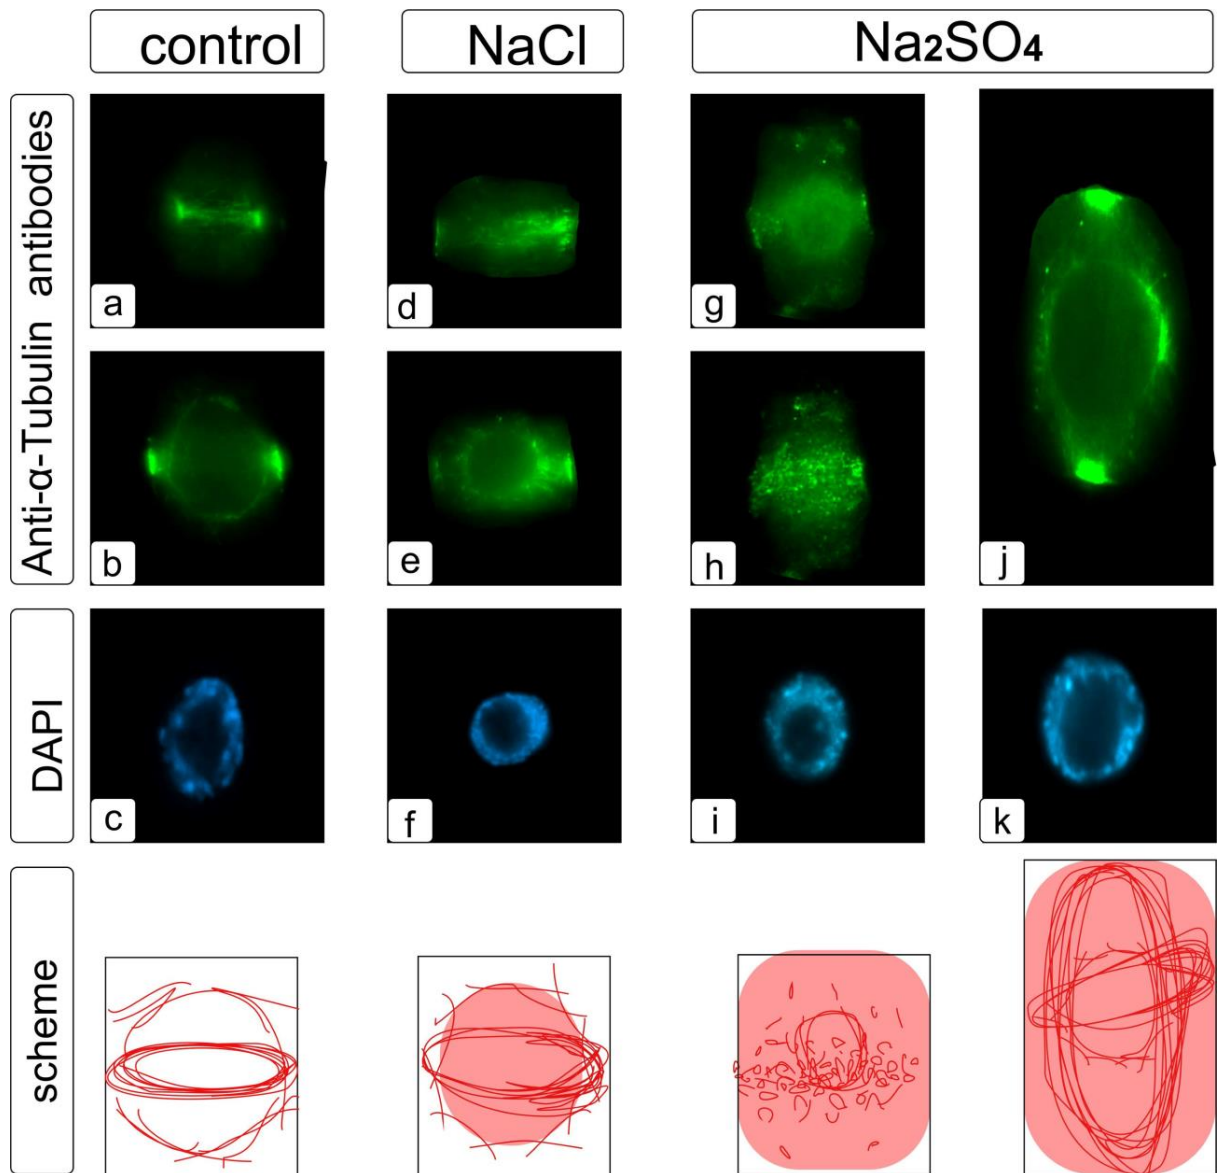

Supplement. Figure S4. Features of the metaphase cytoskeleton structure and distribution of  $\alpha$ -tubulin in wheat seedlings during germination in water and in the presence of NaCl and Na<sub>2</sub>SO<sub>4</sub>. The phase of the cell cycle was determined by the identification of DNA staining using the DAPI assay (c,f,i,k). For most cells, an optical section is taken in the level of the cortical cytoplasm - cell periphery (a,d,g) and in the nucleus level - central part (b,e,h,j).

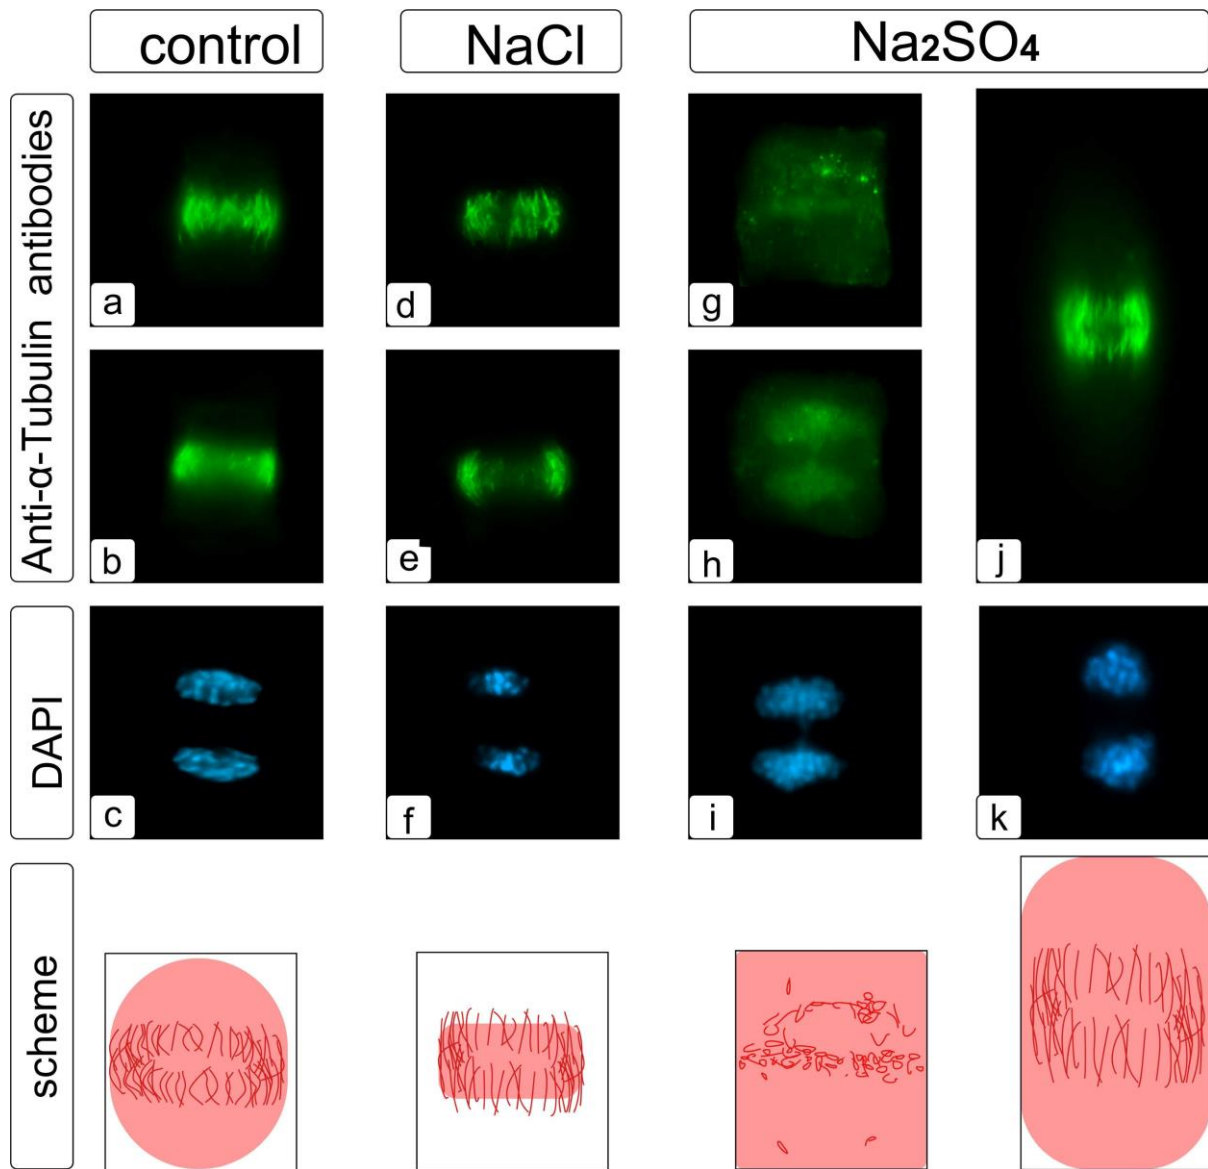

Supplement. Figure S5. Features of the anaphase cytoskeleton structure and distribution of  $\alpha$ -tubulin in wheat seedlings during germination in water and in the presence of NaCl and Na<sub>2</sub>SO<sub>4</sub>. The phase of the cell cycle was determined by the identification of DNA staining using the DAPI assay (c,f,i,k). For most cells, an optical section is taken in the level of the cortical cytoplasm - cell periphery (a,d,g) and in the nucleus level - central part (b,e,h,j).

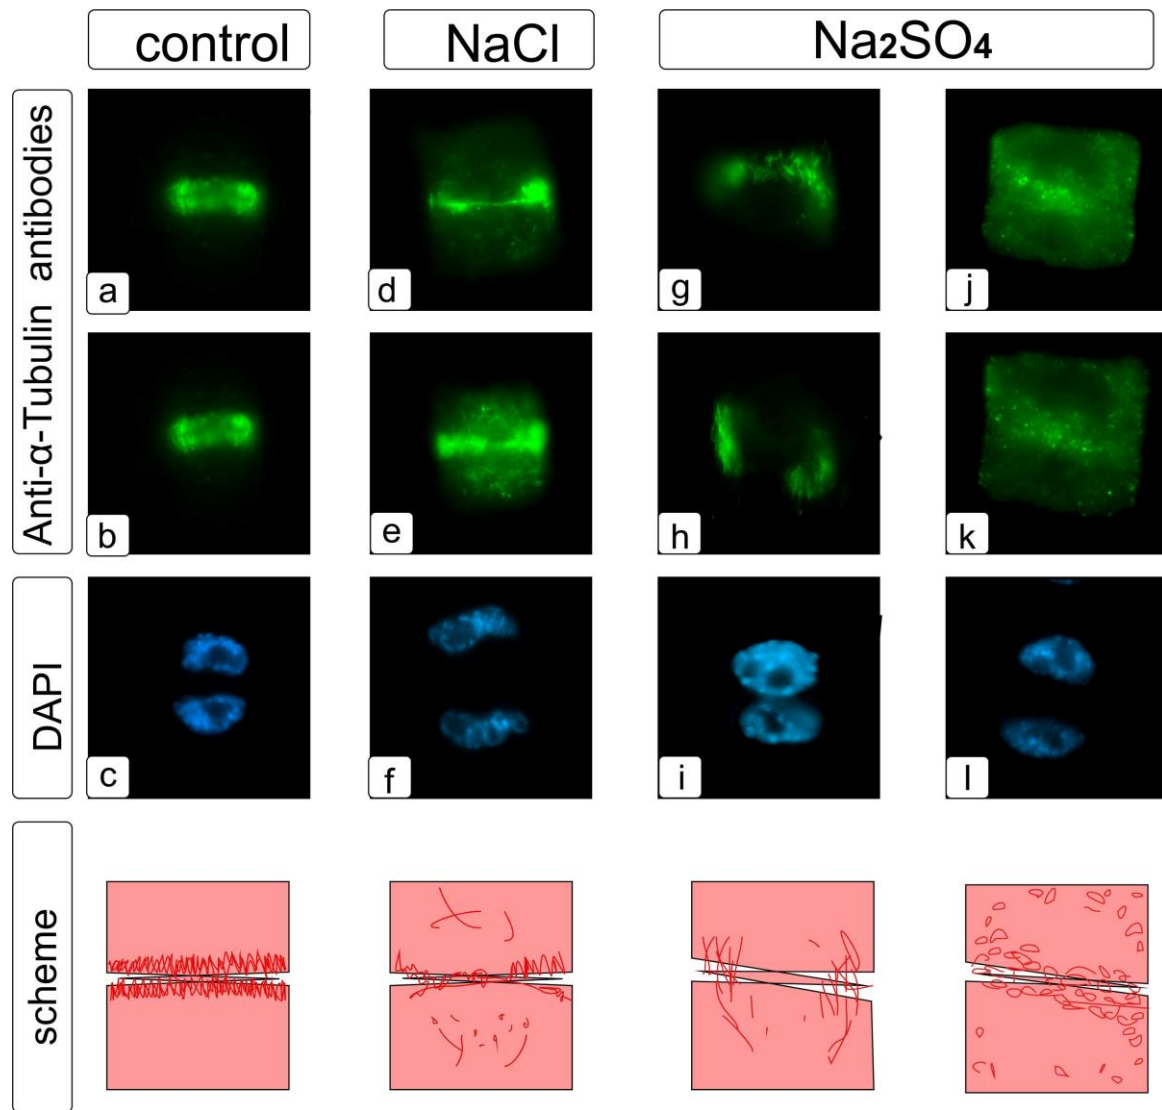

Supplement. Figure S6. Features of the telophase cytoskeleton structure and distribution of  $\alpha$ -tubulin in cells of wheat seedlings during germination in water and in the presence of NaCl and Na<sub>2</sub>SO<sub>4</sub>. The cell cycle phase was determined by DNA staining using the DAPI assay (c,f,i,l). For most cells, a light microscopy of the optical section is shown in the level of the cortical cytoplasm - cell periphery (a,d,g,j) and in the nucleus level - central part (b,e,h,k).



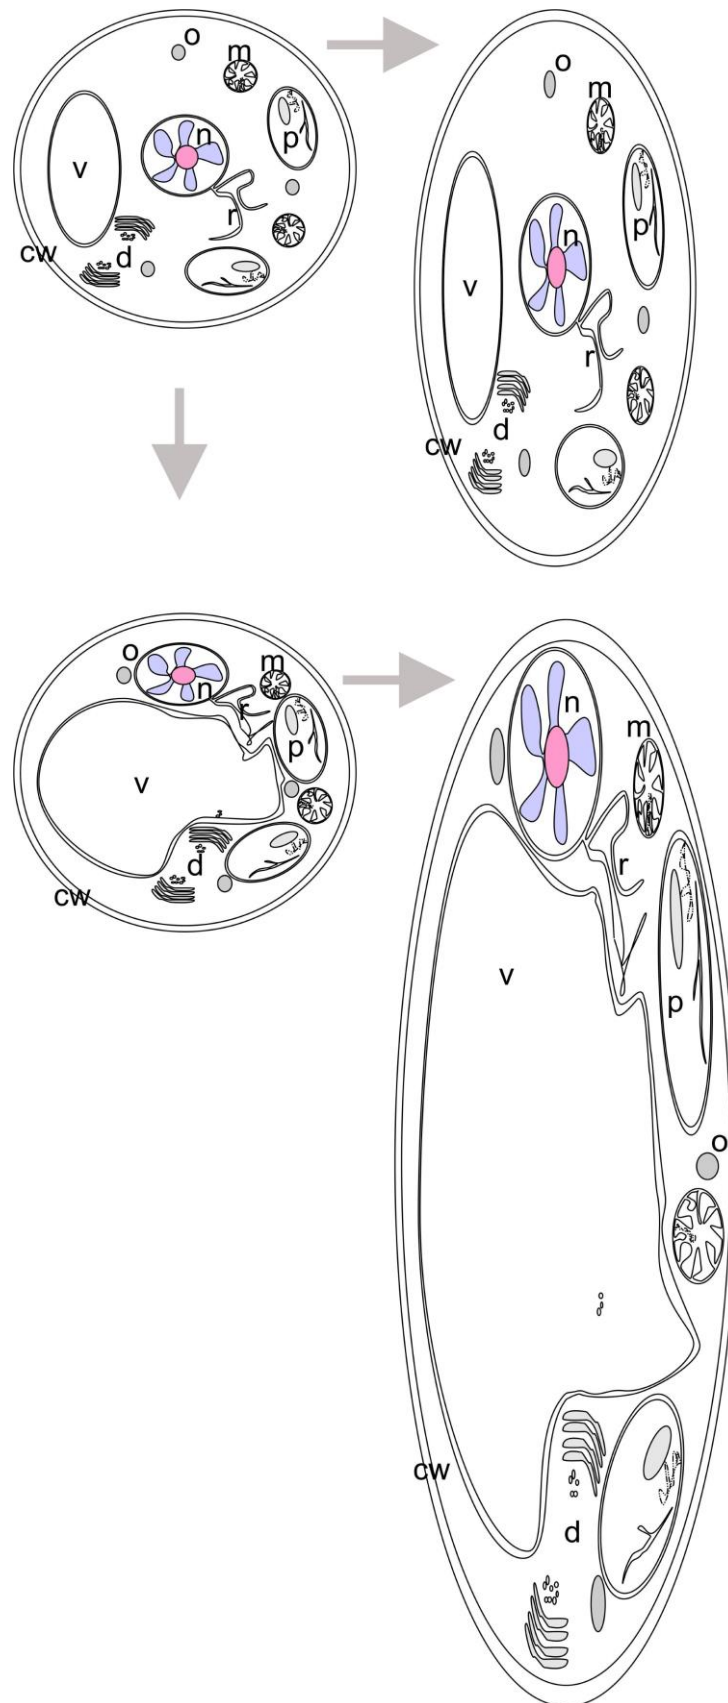

Supplement. Figure S7. Changes in the root cell shape occurring during growth in the meristem zone and differentiation as the volume of the cell vacuole in the extension zone increases. Abbreviations: cw – cell wall, v – vacuole, n – nucleus, m – mitochondrion, p – plastid, o – lipid drop, r – endoplasmic reticulum, d – dictyosome.
